*Carol Wiley Cassella, M.D., Editor*

## Losing My Grip

Christopher Wiley, M.D.\*

A  
AWASH in testosterone, high school football, broken neck  
Beyond the coach's gaping face  
Burned the pale blue sky

Now, beard salt and pepper, hairline in full retreat  
My right hand's gone clumsy and weak  
Belonging to a stranger not fluent in my dialect

The mindless, fluid, facile ways I used to touch the world  
Replaced by halting baby steps  
Demanding full attention, contemplative and slow

I struggle to pull the battle group medallion from my pocket  
Remember uniforms, salutes, firm handshakes, distant lands—  
Cherry blossoms in Tokyo on the late Spring breeze

---

\* Dartmouth-Hitchcock Medical Center, Lebanon, New Hampshire. cwwiley@me.com

Accepted for publication February 7, 2012.

Copyright © 2012, the American Society of Anesthesiologists, Inc. Lippincott Williams & Wilkins. Anesthesiology 2012; 117:910
